# Supplementary material for: Validity assessment of the PROMIS fatigue domain among people living with HIV
Source: PubMed Central journal article supplement (PMC5387298; doi:10.1186/s12981-017-0146-y), 2017-04-11
Supplement: 12981_2017_146_MOESM1_ESM.pdf [file 12981_2017_146_MOESM1_ESM.pdf]

## Validity assessment of the PROMIS Fatigue domain among people living with HIV

LE Gibbons, R Fredericksen, DS Batey, L Dant, TC Edwards, KH Mayer, WC Mathews, LS Morales, MJ Mugavero, FM Yang, E Paez, MM Kitahata, DL Patrick, HM Crane, PK Crane

Corresponding Author: Laura Gibbons, gibbonsl@u.washington.edu

### Additional file 1.

Loadings and thresholds for Mplus based on the PROMIS item bank parameters, and using 2 anchor items and 5 freely estimated items.

|                                                                        | PROMIS item bank parameters |        |            |       |       | Only 2 items fixed |        |            |       |       |
|------------------------------------------------------------------------|-----------------------------|--------|------------|-------|-------|--------------------|--------|------------|-------|-------|
|                                                                        | Loading                     |        | Thresholds |       |       | Loading            |        | Thresholds |       |       |
| How often did you feel tired?                                          | 1.000                       | -0.978 | -0.395     | 0.445 | 1.252 | .956               | -1.549 | -0.457     | 0.697 | 1.712 |
| How often did you run out of energy?                                   | 1.035                       | -0.764 | -0.145     | 0.612 | 1.391 | .959               | -0.972 | 0.037      | 1.036 | 2.074 |
| How often were you too tired to take a bath or shower?                 | 0.884                       | 0.238  | 0.722      | 1.293 | 1.876 | .904               | 0.346  | 1.026      | 1.881 | 2.995 |
| How often did you experience extreme exhaustion?                       | 0.960                       | 0.100  | 0.635      | 1.174 | 1.857 | .936               | -0.105 | 0.785      | 1.608 | 2.654 |
| How often did your fatigue limit you at work (including work at home)? | 0.951                       | -0.517 | 0.310      | 1.289 | 2.211 | .951               | -0.517 | 0.310      | 1.289 | 2.211 |
| How often were you too tired to think clearly?                         | 0.948                       | -0.101 | 0.776      | 1.721 | 2.891 | .948               | -0.101 | 0.776      | 1.721 | 2.891 |
| How often did you have enough energy to exercise strenuously?          | 0.276                       | -0.392 | 0.208      | 0.871 | 1.646 | .761               | -1.890 | -0.640     | 0.256 | 1.136 |

The fifth and sixth items (in red), "*How often did your fatigue limit you at work (including work at home)?*" and "*How often were you too tired to think clearly?*" were the anchor items. In PROMIS, "*How often did you have enough energy to exercise strenuously?*" had a much weaker loading than the other items, and in our data the item was weighted even less.
